# Supplementary material for: Anion gap as a prognostic tool for risk stratification in critically ill patients – a systematic review and meta-analysis
Source: Springer Nature journal article supplement (doi:10.1186/s12871-016-0241-y), 2015-12-01

Summary meta-analysis plot [random effects]

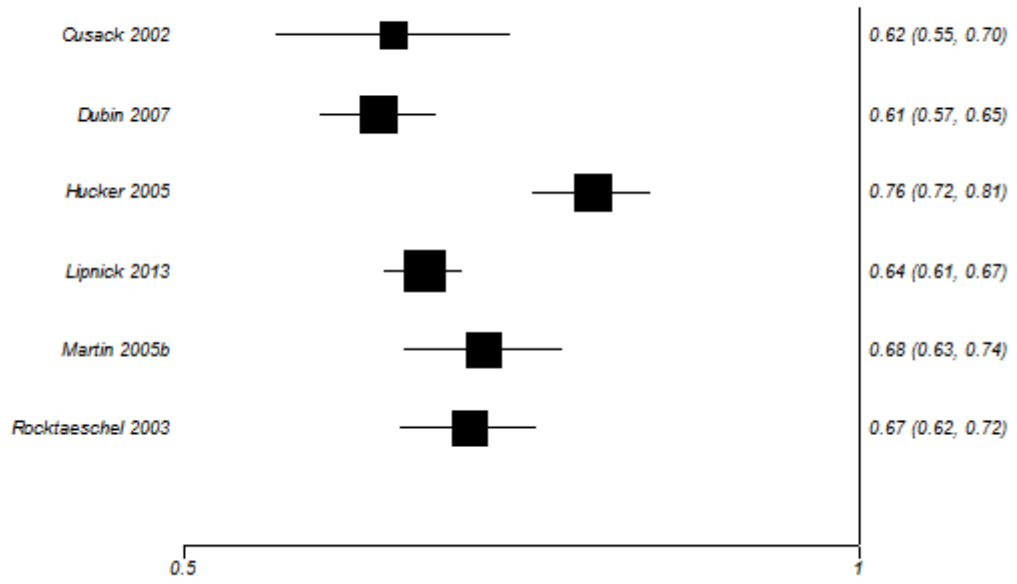

Supplement: MOESM1 [file 10632580]
